# Supplementary material for: Injectable biomaterial induces regeneration of the intervertebral disc in a caprine loaded disc culture model
Source: Royal Society of Chemistry journal article supplement (doi:10.1039/d3bm00150d), 2023-01-01
Supplement: d3bm00150d1.pdf [file d3bm00150d1.pdf]

**Supplementary Figure 1:** Schematic representing mechanical loading regime in LDCS:  
reproduced with kind permission<sup>58</sup>.
