# Supplementary material for: Injectable biomaterial induces regeneration of the intervertebral disc in a caprine loaded disc culture model
Source: Royal Society of Chemistry journal article supplement (doi:10.1039/d3bm00150d), 2023-01-01

## Simulated Physiological Loading

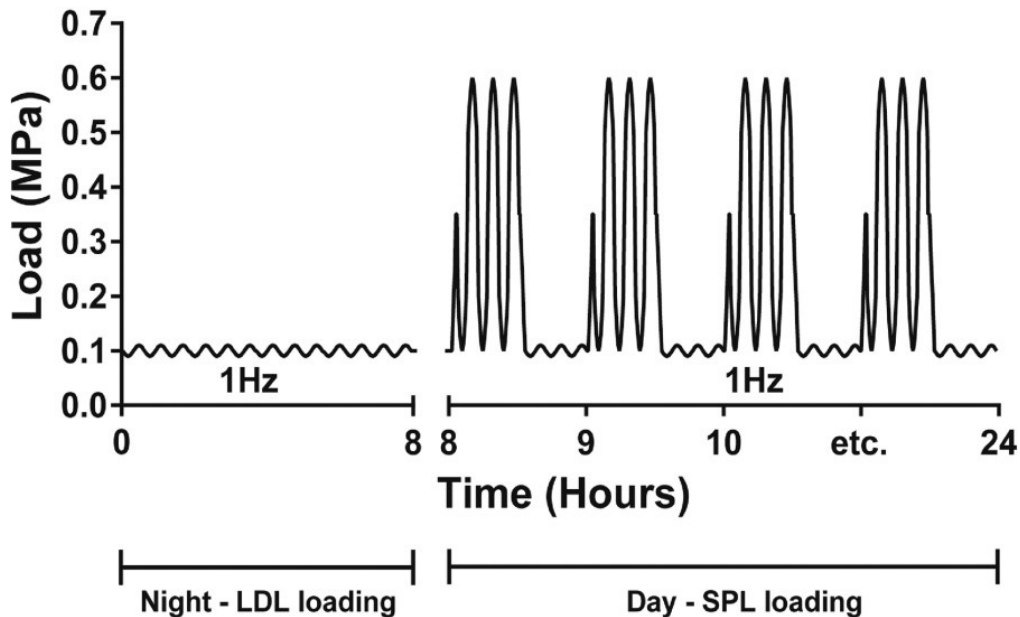

Supplement: d3bm00150d2.pdf [file d3bm00150d2.pdf]
